# Supplementary material for: Carbon emission reduction strategy of manufacturer’s reciprocal preference under government subsidy
Source: Research Square preprint supplement (doi:10.21203/rs.3.rs-6875896/v1), 2025-09-08
Supplement: Supplementary file 1 [file e6765fb11a321483abe284db.docx]

**Appendix:** **Proof of Proposition1.**

The decision-making objectives of suppliers, manufacturers and governments are simplified as follows:

Then, the optimal profit function of the supplier and the manufacturer at time t is transformed into:

At this stage, the optimal control problem for the supplier, manufacturer, and government satisfies the following HJB equation:

Let be a concave function with respect to and be a concave function with respect to . The partial derivatives of with respect to and with respect to are obtained respectively.

Substituting and into , the partial derivatives of with respect to and can be obtained :

Substituting and into , and respectively, we can obtain :

According to the characteristics of the above differential equation, it is speculated that the linear optimal value function of G is the solution of the HJB equation.

Let , , be expressed as follows:

where are unknown constants,. By substituting , into and and comparing the coefficients of the same term at both ends of the equation, it can be obtained that :

Substituting , into , and ), we can obtain :

Substituting ,,,,, into ,, we can obtain

The optimal trajectory of carbon emission reduction in supply chain is:

Where .

Proposition 1 is proven. The proof methodologies of Proposition 2 and Proposition 3 bear resemblance to that of Proposition 1.
